# Supplementary material for: Bio-Based Starch Films from Ripe Plantain Peels: Kinetic Modelling and Physicomechanical Assessment
Source: Research Square preprint supplement (doi:10.21203/rs.3.rs-8189533/v1), 2025-12-17
Supplement: Supplementary file 1 [file dc4c26f6a0a58182bd52be0a.pdf]

# BIO-BASED STARCH FILMS FROM RIPE PLANTAIN PEELS: KINETIC MODELLING AND PHYSICOMECHANICAL ASSESSMENT (Data availability statement)

Cosmos Kojo Boateng <sup>a, b\*</sup>, Persis Tweneboah <sup>c</sup>, Arafat Mohammed <sup>c</sup>

<sup>a</sup>, Department of Applied Chemistry, School of Chemical and Biochemical Sciences, C. K. Tedam University of Technology and Applied Sciences, Navrongo, Ghana.

<sup>b</sup> Regional water & Environmental Sanitation Centre Kumasi (RWESCK) Laboratories, Kwame Nkrumah University of Science and Technology, Kumasi, Ghana.

<sup>c</sup> Department of Biochemistry and Forensic Sciences, School of Chemical and Biochemical Sciences, C. K. Tedam University of Technology and Applied Sciences, Navrongo, Ghana.

\*Corresponding author E-mail address: [cosmosboateng060@gmail.com](mailto:cosmosboateng060@gmail.com)

## 1. Biodegradability studies

| Week | Weight (g) at a particular time | Difference between initial and final weight (g) |
|------|---------------------------------|-------------------------------------------------|
| 0    | 7.000                           | 7.000                                           |
| 1    | 2.532                           | 4.468                                           |
| 2    | 2.130                           | 4.870                                           |
| 3    | 1.424                           | 5.576                                           |
| 4    | 0.706                           | 6.234                                           |

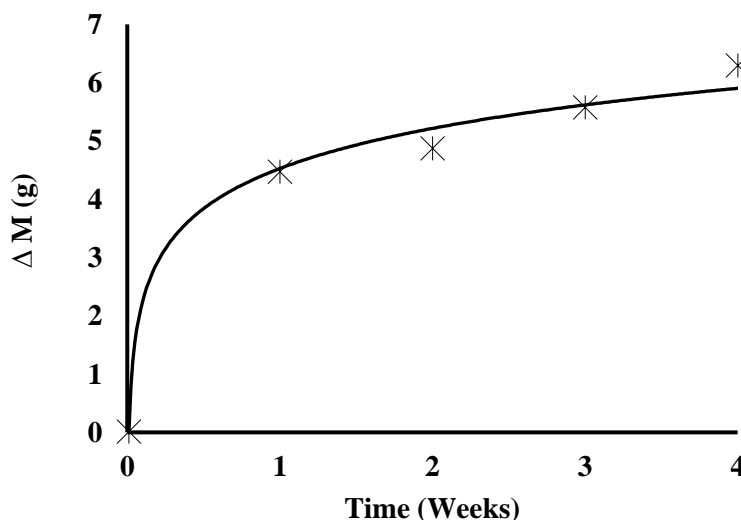

**Figure 1:** Biodegradation curve of RPP bioplastic film showing rapid early mass loss and gradual stabilization over 28 days

## 2. Kinetic Studies

### 1. First Order Kinetic Model [Time Vs $\ln(W_t/W_0)$ ]

| Time (week) | Weight (g) at a particular time ( $W_t$ ) | Initial weight (g) ( $W_0$ ) | $W_t/W_0$ | $\ln(W_t/W_0)$ |
|-------------|-------------------------------------------|------------------------------|-----------|----------------|
| 0           | 7.000                                     | 7.000                        | 1.000     | 0              |
| 1           | 2.532                                     | 7.000                        | 0.362     | -1.017         |
| 2           | 2.130                                     | 7.000                        | 0.304     | -1.188         |
| 3           | 1.424                                     | 7.000                        | 0.203     | -1.592         |
| 4           | 0.706                                     | 7.000                        | 0.101     | -2.294         |

### 2. Zero Order Kinetic Model (Time Vs $W_t$ )

| Time (week) | Weight (g) at a particular time ( $W_t$ ) |
|-------------|-------------------------------------------|
| 1           | 2.532                                     |
| 2           | 2.130                                     |
| 3           | 1.424                                     |
| 4           | 0.706                                     |

### 3. Second Order Kinetic Model (Time Vs $1/W_t$ )

| Time (week) | Weight (g) at a particular time ( $W_t$ ) | $1/W_t$ |
|-------------|-------------------------------------------|---------|
| 1           | 2.532                                     | 0.395   |
| 2           | 2.130                                     | 0.469   |
| 3           | 1.424                                     | 0.702   |
| 4           | 0.706                                     | 1.416   |

### 4. Korsmeyer–Peppas model [ $\ln(\text{Time})$ Vs $\ln(\Delta W/W_0)$ ]

| Time | $\ln(\text{Time})$ | $\Delta W = (W_0 - W_t)$ | $\Delta W/W_0$ | $\ln(\Delta W/W_0)$ |
|------|--------------------|--------------------------|----------------|---------------------|
| 1    | 0.000              | 4.468                    | 0.638          | -0.449              |
| 2    | 0.693              | 4.870                    | 0.696          | -0.362              |
| 3    | 1.097              | 5.903                    | 0.843          | -0.171              |
| 4    | 1.386              | 5.614                    | 0.802          | -0.221              |

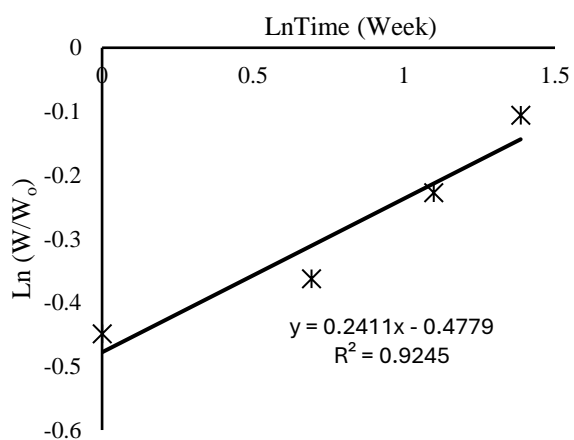

**Figure 1:** Korsmeyer-Peppas model

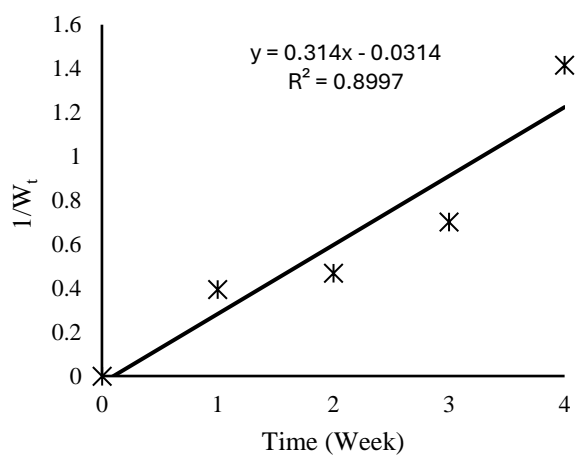

**Figure 3:** Second Order Kinetics Model

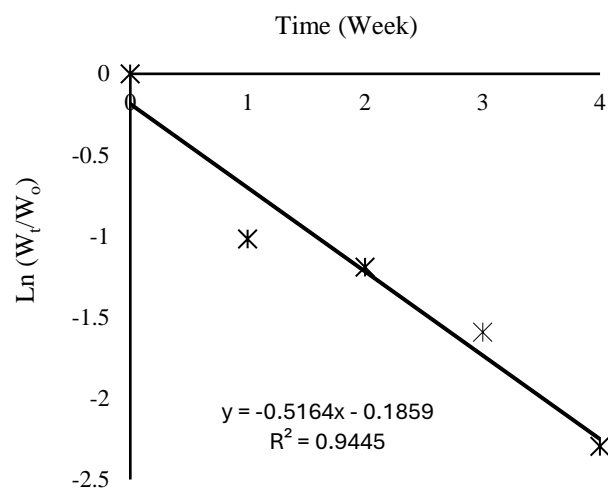

**Figure 4:** First Order Kinetics Model

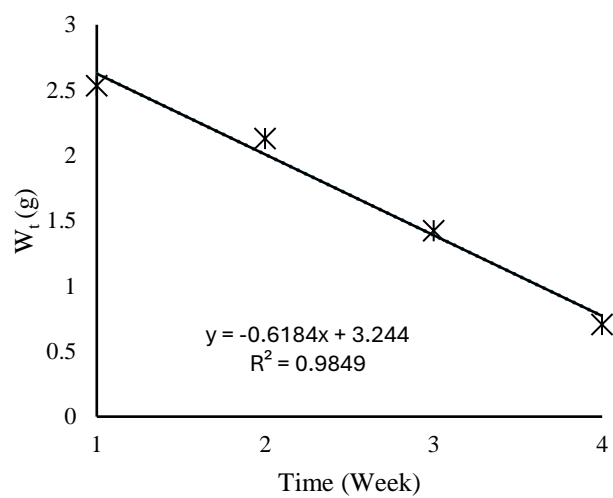

**Figure 5:** Zero Order Kinetics Model
